1     **Subacute SARS-CoV-2 replication can be controlled in the absence of CD8<sup>+</sup> T cells in**  
2     **cynomolgus macaques**

3     Short title: Subacute SARS-CoV-2 replication can be controlled without CD8<sup>+</sup> T cells

4

5     Takushi Nomura<sup>1\*</sup>, Hiroyuki Yamamoto<sup>1</sup>, Masako Nishizawa<sup>1</sup>, Trang Thi Thu Hau<sup>1</sup>,  
6     Shigeyoshi Harada<sup>1</sup>, Hiroshi Ishii<sup>1</sup>, Sayuri Seki<sup>1</sup>, Midori Nakamura-Hoshi<sup>1</sup>, Midori Okazaki<sup>1</sup>,  
7     Sachie Daigen<sup>1</sup>, Ai Kawana-Tachikawa<sup>1,2,3</sup>, Noriyo Nagata<sup>4</sup>, Naoko Iwata-Yoshikawa<sup>4</sup>, Nozomi  
8     Shiwa<sup>4</sup>, Shun Iida<sup>4</sup>, Harutaka Katano<sup>4</sup>, Tadaki Suzuki<sup>4</sup>, Eun-Sil Park<sup>5</sup>, Ken Maeda<sup>5</sup>, Yuriko  
9     Suzaki<sup>6</sup>, Yasushi Ami<sup>6</sup>, and Tetsuro Matano<sup>1,2,3\*</sup>

10

11     <sup>1</sup>AIDS Research Center, National Institute of Infectious Diseases, Tokyo, Japan

12     <sup>2</sup>Institute of Medical Science, University of Tokyo, Tokyo, Japan

13     <sup>3</sup>Joint Research Center for Human Retrovirus Infection, Kumamoto University, Kumamoto, Japan

14     <sup>4</sup>Department of Pathology, National Institute of Infectious Diseases, Tokyo, Japan

15     <sup>5</sup>Department of Veterinary Science, National Institute of Infectious Diseases, Tokyo, Japan

16     <sup>6</sup>Division of Laboratory Animal Research, National Institute of Infectious Diseases, Tokyo,  
17     Japan

18

19     \*Equally-contributed    corresponding    authors:    nomutaku@nih.go.jp    (TN)    and  
20     tmatano@nih.go.jp (TM)

21

22        **Abstract**

23        SARS-CoV-2 infection presents clinical manifestations ranging from asymptomatic to fatal  
24        respiratory failure. Despite the induction of functional SARS-CoV-2-specific CD8<sup>+</sup> T-cell  
25        responses in convalescent individuals, the role of virus-specific CD8<sup>+</sup> T-cell responses in the  
26        control of SARS-CoV-2 replication remains unknown. In the present study, we show that  
27        subacute SARS-CoV-2 replication can be controlled in the absence of CD8<sup>+</sup> T cells in  
28        cynomolgus macaques. Eight macaques were intranasally inoculated with 10<sup>5</sup> or 10<sup>6</sup> TCID<sub>50</sub> of  
29        SARS-CoV-2, and three of the eight macaques were treated with a monoclonal anti-CD8  
30        antibody on days 5 and 7 post-infection. In these three macaques, CD8<sup>+</sup> T cells were  
31        undetectable on day 7 and thereafter, while virus-specific CD8<sup>+</sup> T-cell responses were induced  
32        in the remaining five untreated animals. Viral RNA was detected in nasopharyngeal swabs for  
33        10-17 days post-infection in all macaques, and the kinetics of viral RNA levels in pharyngeal  
34        swabs and plasma neutralizing antibody titers were comparable between the anti-CD8 antibody  
35        treated and untreated animals. SARS-CoV-2 RNA was detected in the pharyngeal mucosa  
36        and/or retropharyngeal lymph node obtained at necropsy on day 21 in two of the untreated  
37        group but undetectable in all macaques treated with anti-CD8 antibody. CD8<sup>+</sup> T-cell responses  
38        may contribute to viral control in SARS-CoV-2 infection, but our results indicate possible  
39        containment of subacute viral replication in the absence of CD8<sup>+</sup> T cells, implying that CD8<sup>+</sup>  
40        T-cell dysfunction may not solely lead to viral control failure.

41

42 **Author Summary**

43 SARS-CoV-2 infection presents a wide spectrum of clinical manifestations ranging from  
44 asymptomatic to fatal respiratory failure. The determinants for failure in viral control and/or  
45 fatal disease progression have not been elucidated fully. Both acquired immune effectors,  
46 antibodies and CD8<sup>+</sup> T cells, are considered to contribute to viral control. However, it remains  
47 unknown whether a deficiency in either of these two arms is directly linked to failure in the  
48 control of SARS-CoV-2 replication. In the present study, to know the requirement of CD8<sup>+</sup> T  
49 cells for viral control after the establishment of infection, we examined the effect of CD8<sup>+</sup> cell  
50 depletion by monoclonal anti-CD8 antibody administration in the subacute phase on SARS-  
51 CoV-2 replication in cynomolgus macaques. Unexpectedly, our analysis revealed no significant  
52 impact of CD8<sup>+</sup> cell depletion on viral replication, indicating that subacute SARS-CoV-2  
53 replication can be controlled in the absence of CD8<sup>+</sup> T cells. CD8<sup>+</sup> T-cell responses may  
54 contribute to viral control in SARS-CoV-2 infection, but this study suggests that CD8<sup>+</sup> T-cell  
55 dysfunction may not solely lead to viral control failure or fatal disease progression.

56

## 57 **Introduction**

58 The coronavirus disease 2019 (COVID-19) caused by severe acute respiratory syndrome  
59 coronavirus 2 (SARS-CoV-2) has rapidly spread resulting in a major pandemic [1]. SARS-CoV-  
60 2 transmission occurs via the respiratory route, and the average incubation period from infection  
61 to symptom onset has been estimated to be 5 days [2]. SARS-CoV-2 infection presents a wide  
62 spectrum of clinical manifestations ranging from asymptomatic to fatal respiratory failure [3].  
63 Multiple confounding factors such as age and underlying diseases are associated with COVID-  
64 19 severity [4-8]. For instance, auto-antibodies against type I interferon have been reported to  
65 be associated with life-threatening COVID-19 pneumonia [9,10]. However, the exact  
66 determinants for failure in viral control and/or fatal disease progression have not been  
67 elucidated fully.

68 Most non-fatal COVID-19 cases show a limited period of detectable virus production in  
69 pharyngeal swabs peaking at around one week post-infection [11]. Host acquired as well as  
70 innate immune responses are involved in the control of viral replication [8,12-14]. Anti-SARS-  
71 CoV-2 neutralizing antibodies are induced in most infected individuals [13-16]. Recent clinical  
72 studies including those on convalescent plasma and/or monoclonal antibody administration  
73 have indicated efficacy of neutralizing antibodies against SARS-CoV-2 infection [17-20].  
74 Animal studies have confirmed *in vivo* efficacy of neutralizing antibodies against infection [21-  
75 25]. Also, SARS-CoV-2-specific T-cell responses are induced in most non-fatal COVID-19  
76 cases [26-28]. Current studies have indicated induction of functional virus-specific CD8<sup>+</sup> T-  
77 cell responses in convalescent COVID-19 individuals, implying suppressive pressure of CD8<sup>+</sup>  
78 T cells on SARS-CoV-2 replication [29,30]. Thus, both acquired immune effectors, antibodies  
79 and CD8<sup>+</sup> T cells, are considered to contribute to viral control. However, it remains unknown  
80 whether a deficiency in either of these two arms is directly linked to failure in the control of  
81 SARS-CoV-2 replication. It has been reported that COVID-19 patients with

82 agammaglobulinemia controlled disease progression, suggesting viral control even in the  
83 absence of antibody responses [31].

84 A previous study of anti-CD8 antibody administration prior to re-infection in rhesus  
85 macaques has indicated partial contribution of CD8<sup>+</sup> T cells to protection against SARS-CoV-  
86 2 re-infection [25]. However, the requirement of CD8<sup>+</sup> T cells for the control of virus replication  
87 after the establishment of infection remains unclear. In the present study, we investigated the  
88 effect of CD8<sup>+</sup> cell depletion by monoclonal anti-CD8 antibody administration in the subacute  
89 phase on SARS-CoV-2 replication in cynomolgus macaques. Unexpectedly, our analysis  
90 revealed no significant impact of CD8<sup>+</sup> cell depletion on viral replication, indicating that  
91 subacute SARS-CoV-2 replication can be controlled in the absence of CD8<sup>+</sup> T cells.

92

## 93 **Results**

### 94 **Kinetics of SARS-CoV-2 infection in cynomolgus macaques after intranasal inoculation**

95 Previous studies have shown that intranasal and intratracheal inoculation with  $10^5$  TCID<sub>50</sub>  
96 (50% tissue culture infective doses) of SARS-CoV-2 results in the establishment of infection in  
97 rhesus macaques, with viral RNA detectable for more than a week post-infection in pharyngeal  
98 swabs [32,33]. In the present study, we first examined whether intranasal SARS-CoV-2  
99 inoculation only can result in viral infection in cynomolgus macaques. In the first experiment,  
100 cynomolgus macaques were intranasally inoculated with  $10^6$  (exactly  $7.5 \times 10^5$  in macaque  
101 N011),  $10^5$  (exactly  $7.5 \times 10^4$  in macaques N012 and N013), or  $10^4$  (exactly  $7.5 \times 10^3$  in macaque  
102 N014) TCID<sub>50</sub> of SARS-CoV-2 (Table 1). Macaques N011, N012, and N013 showed similar  
103 levels of viral RNA in nasopharyngeal swabs on day 2, at the peak (Fig 1A). Viral RNA was  
104 also detected in throat swabs with a lower peak (Fig 1B). Viral RNA in nasopharyngeal swabs  
105 was detectable for approximately two weeks (up to: day 17 in N011, day 12 in N012, and day  
106 14 in N013) after virus inoculation (Fig 1A, 1C, and 1D). Subgenomic RNAs (sgRNAs) were  
107 also detected in nasopharyngeal and throat swabs, indicating viral replication (Fig 2A and 2B).  
108 SARS-CoV-2 sgRNAs were detected in nasopharyngeal swabs until day 9 in N011, day 7 in  
109 N012, and day 5 in N013 (Fig 2A, 2C, and 2D). However, in macaque N014, which was  
110 inoculated with  $10^4$  TCID<sub>50</sub> of SARS-CoV-2, sgRNAs were undetectable, and viral RNAs were  
111 detectable albeit at lower levels, only until day 5 in nasopharyngeal swabs (Fig 1A and Fig 2A),  
112 indicating that  $10^4$  TCID<sub>50</sub> is below the virus inoculum threshold to consistently induce  
113 detectable viral replication. N014 was subsequently excluded from further analyses.

114 In the second experiment, two (N021 and D023) and three (N022, D024, and D025)  
115 macaques were intranasally inoculated with  $10^6$  and  $10^5$  TCID<sub>50</sub> of SARS-CoV-2, respectively  
116 (Table 1). Monoclonal anti-CD8 antibody was administered intravenously on days 5 and 7 to  
117 three (D023, D024, and D025 in Group D) of the five macaques. All of the five macaques in

118 the second experiment showed comparable levels of viral RNAs and sgRNAs in  
119 nasopharyngeal swabs on day 2 compared to the three macaques inoculated with  $10^6$  or  $10^5$   
120  $TCID_{50}$  of SARS-CoV-2 in the first experiment (Fig 1A and Fig 2A). Indeed, no significant  
121 difference in RNA levels in nasopharyngeal swabs on day 5 was observed between the first  
122 three and the second five animals (Fig 1E). No clear difference in viral loads in either  
123 nasopharyngeal or throat swabs on days 2 and 5 was observed between macaques inoculated  
124 with  $10^6$  ( $n = 3$ ) and  $10^5$  ( $n = 5$ )  $TCID_{50}$  of SARS-CoV-2 (Fig 1C and 1D and Fig 2C and 2D).  
125 Viral RNA in nasopharyngeal swabs was detectable until day 14 in N021 and day 10 in N022  
126 following inoculation (Fig 1A, 1C, and 1D). SARS-CoV-2 sgRNAs in nasopharyngeal swabs  
127 were detected until day 5 in N021 and day 7 in N022 following inoculation (Fig 2A, 2C, and  
128 2D). Collectively, in the first and second experiments, intranasal inoculation of cynomolgus  
129 macaques with  $10^6$  or  $10^5$   $TCID_{50}$  of SARS-CoV-2 resulted in viral replication with viral RNA  
130 detectable for 10-17 days in nasopharyngeal swabs.

### 131 132 **Kinetics of SARS-CoV-2 infection after CD8<sup>+</sup> cell depletion**

133 We then investigated the effect of CD8<sup>+</sup> cell depletion on viral replication in the subacute  
134 phase of SARS-CoV-2 infection. In the three Group D macaques administered with anti-CD8  
135 antibody on days 5 and 7, CD8<sup>+</sup> T cells were undetectable in peripheral blood on day 7 and  
136 thereafter (Fig 3). These three macaques showed comparable levels of viral RNA in  
137 nasopharyngeal swabs before (day 5) and after (day 7) anti-CD8 antibody treatment compared  
138 to the five untreated Group N macaques (Fig 1F). Viral RNA in nasopharyngeal swabs was  
139 detectable until day 10 in D025 and day 14 in macaques D023 in D024 after virus inoculation  
140 (Fig 1A, 1C, and 1D). Viral sgRNAs in nasopharyngeal swabs were detected until day 2 in  
141 D023, day 5 in D024, and day 7 in D025 (Fig 2A, 2C, and 2D). Collectively, no clear difference  
142 in viral RNA levels in swabs was observed for the three anti-CD8 antibody-treated Group D

143 versus the five untreated Group N macaques.

144 We also examined whether virus could be recovered from individual swab samples (Table  
145 2). SARS-CoV-2 was recovered from nasopharyngeal and throat swabs from all eight animals  
146 intranasally inoculated with either  $10^6$  or  $10^5$  TCID<sub>50</sub>. Virus was recovered for 2-12 days in anti-  
147 CD8 antibody-untreated macaques (until day 2 in N021, day 5 in N013 and N022, day 7 in  
148 N011, and day 12 in N012) and for 2-7 days in anti-CD8 antibody-treated macaques (until day  
149 2 in D024 and day 7 in D023 and D025). There was no indication of enhanced virus recovery  
150 after CD8 cell depletion.

151 Macaque N021 was euthanized on day 14, while the remaining animals were euthanized  
152 on day 21 post-infection (Table 1). Examination of body temperature showed transient slight  
153 fever in some animals (on day 2 in N021 and D025; on day 6 in D023 and D024; on days 13-  
154 19 in N012) (S1 Fig). Histopathological analysis of the lung obtained at necropsy on day 14 in  
155 macaque N021 revealed mild or moderate pulmonary inflammation (S2 Fig), whereas no  
156 significant pathology in the lung was detected on day 21 in other animals.

157 RNA was extracted from the pharyngeal mucosa, retropharyngeal lymph nodes (RPLN),  
158 lung, intestine, and spleen obtained at necropsy, and subjected to RT-PCR for detection of viral  
159 RNA (Table 3). Viral RNA was undetectable in tissues from macaques N012, N014, N021,  
160 D023, and D024. However, viral RNA was detected in the RPLN of N011, in the pharyngeal  
161 mucosa, RPLN, and spleen of N013, and in the spleens of N022 and D025. Additionally, viral  
162 sgRNAs were also detectable in pharyngeal mucosa, RPLN, and spleen of N013. There was no  
163 evidence of enhanced viral replication in anti-CD8 antibody-treated macaques.

164

### 165 **Antibody and T-cell responses in macaques after intranasal SARS-CoV-2 inoculation**

166 Anti-SARS-CoV-2 neutralizing antibody (NAb) responses were induced in all the  
167 macaques after intranasal SARS-CoV-2 inoculation (Fig 4) NAb responses were detected on



168 day 7 in macaques N021 and D025 only, and in all animals on day 14. Macaques D025 and  
169 D024 exhibited the highest and lowest NAb titers, respectively. No clear difference in NAb  
170 responses was observed between the three anti-CD8 antibody-treated and the five untreated  
171 macaques.

172 Finally, we examined CD8<sup>+</sup> T-cell responses specific for SARS-CoV-2 spike (S),  
173 nucleocapsid (N), and membrane-and-envelope (M&E) antigens in the five anti-CD8 antibody-  
174 untreated macaques inoculated with 10<sup>6</sup> or 10<sup>5</sup> TCID<sub>50</sub> of SARS-CoV-2. In the analysis using  
175 peripheral blood mononuclear cells (PBMCs), SARS-CoV-2-specific CD8<sup>+</sup> T-cell responses  
176 were undetectable in macaque N013 but detected in the remaining four macaques (Fig 5A and  
177 5B). Macaque N022 exhibited CD8<sup>+</sup> T-cell responses on day 7 while the remaining three  
178 macaques (N011, N012, and N021) showed initial SARS-CoV-2 specific responses on day 14.  
179 Analysis using submandibular lymph nodes (SMLN) obtained at necropsy found SARS-CoV-  
180 2-specific CD8<sup>+</sup> T-cell responses in macaques N011, N013, and N021 (Fig 5C). Interestingly,  
181 SARS-CoV-2-specific CD8<sup>+</sup> T-cell responses were undetectable in PBMCs but detected in  
182 SMLN in macaque N013. Thus, SARS-CoV-2-specific CD8<sup>+</sup> T-cell responses were detected in  
183 all the five anti-CD8 antibody-untreated Group N macaques inoculated with 10<sup>6</sup> or 10<sup>5</sup> TCID<sub>50</sub>  
184 of SARS-CoV-2.

185

186 **Discussion**

187 Host T-cell and B-cell responses have been reported to contribute to the control of SARS-  
188 CoV-2 replication [8,12,13,28]. In a murine model of infection with a mouse-adapted strain of  
189 SARS-CoV, depletion of CD4<sup>+</sup> T cells resulted in reduced neutralizing antibody responses and  
190 delayed virus clearance from the lung [34]. Furthermore, SARS-CoV replication was controlled  
191 in the absence of CD4<sup>+</sup> T and B cells, implicating CD8<sup>+</sup> T cells in viral control [35]. Recent  
192 studies in humans have shown that functional virus-specific CD8<sup>+</sup> T-cell responses are induced  
193 in convalescent COVID-19 individuals [29,30]. These reports suggest contribution of CD8<sup>+</sup> T  
194 cells in the control of SARS-CoV-2 replication. However, it remains unclear whether SARS-  
195 CoV-2 replication can be controlled in the absence of CD8<sup>+</sup> T cells. In the present study, we  
196 investigated the impact of depletion of CD8<sup>+</sup> cells (including CD8<sup>+</sup> T cells) by anti-CD8  
197 antibody administration on SARS-CoV-2 replication in the subacute phase after establishment  
198 of virus infection. We found no significant enhancement of viral replication or delay in viral  
199 clearance after CD8<sup>+</sup> cell depletion, indicating that subacute SARS-CoV-2 replication can be  
200 controlled in the absence of CD8<sup>+</sup> T cells.

201 Our findings do not deny the contribution of CD8<sup>+</sup> T cells in the control of SARS-CoV-  
202 2 replication or the possibility of viral protection by vaccine-induced CD8<sup>+</sup> T cells. What is  
203 indicated in the present study is that CD8<sup>+</sup> T-cell dysfunction is not directly linked to failure in  
204 viral control, possibly implying that there may be multiple arms of host immune mechanisms  
205 involved in containing SARS-CoV-2 replication.

206 An animal model for SARS-CoV-2 infection is necessary for analysis of pathogenesis  
207 and transmission and the evaluation of vaccines and anti-viral drugs. Non-human primate  
208 models are recognized as being the most clinically relevant because of their genetic and  
209 physiological similarities to humans. Recent studies have shown that rhesus and cynomolgus  
210 macaques can be infected with SARS-CoV-2 and exhibit clinical manifestations resembling

211 human COVID-19 [32,36-38]. Both macaque species present mild to moderate forms of  
212 COVID-19, which is observed in the majority of the human population. We thus used a model  
213 of SARS-CoV-2 infection in cynomolgus macaques for analysis of the effect of CD8<sup>+</sup> cell  
214 depletion on virus replication.

215 We attempted SARS-CoV-2 inoculation via the intranasal route only without  
216 intratracheal inoculation, because it may more closely reflect viral transmissions in humans.  
217 The geometric means of peak viral RNAs and sgRNAs in nasopharyngeal swabs (on day 2)  
218 were  $2.7 \times 10^8$  (range:  $1.1 \times 10^8$  to  $5.2 \times 10^8$ ) and  $1.0 \times 10^6$  (range:  $1.8 \times 10^5$  to  $1.8 \times 10^6$ )  
219 copies/swab, respectively, which are equivalent to those in rhesus macaques inoculated both  
220 intranasally and intratracheally with  $10^5$  TCID<sub>50</sub> of SARS-CoV-2 [32,33]. In macaques  
221 inoculated with  $10^5$  TCID<sub>50</sub> ( $1.4 \times 10^8$  RNA copies) of SARS-CoV-2, viral RNA copies in  
222 nasopharyngeal swabs on day 2 were comparable (N012) to or greater (N013, N022, D024, and  
223 D025) than the total viral RNA copies in the inoculum, confirming viral replication in macaques  
224 even with  $10^5$  TCID<sub>50</sub>. The three macaques inoculated with  $10^6$  TCID<sub>50</sub> showed similar levels  
225 of viral RNA in nasopharyngeal swabs on days 2 and 5 compared to the five macaques with  $10^5$   
226 TCID<sub>50</sub>. All the eight macaques intranasally inoculated with  $10^6$  or  $10^5$  TCID<sub>50</sub> of SARS-CoV-  
227 2 developed efficient anti-SARS-CoV-2 NAb responses, and the five anti-CD8 antibody-  
228 untreated macaques induced SARS-CoV-2-specific CD8<sup>+</sup> T-cell responses. Taken together, our  
229 results show that intranasal inoculation of cynomolgus macaques with  $10^6$  or  $10^5$  TCID<sub>50</sub> of  
230 SARS-CoV-2 results in viral replication in the pharyngeal mucosa. Containment of viral  
231 replication in the pharyngeal mucosa would be important for the control of further viral  
232 transmission as well as disease progression.

233 Our cynomolgus macaque model of intranasal but not intratracheal SARS-CoV-2  
234 inoculation is considered to represent asymptomatic or mild COVID-19. However,  
235 histopathological analysis of the lung detected pulmonary inflammation in one animal (N021)

236 on day 14 post-infection (S2 Fig), suggesting the potential of intranasal SARS-CoV-2  
237 inoculation to induce moderate pulmonary diseases. Other animals may also have developed  
238 mild pulmonary inflammation detectable on day 14, which was resolved by day 21. Macaque  
239 N013 showed a unique phenotype with undetectable viral RNAs in swabs after day 14 (Fig 1D)  
240 but relatively higher levels of viral RNA in pharyngeal mucosa and submandibular lymph nodes  
241 on day 21 post-infection (Table 3). Virus-specific CD8<sup>+</sup> T-cell responses were undetectable in  
242 PBMCs but efficiently detected in the submandibular lymph nodes on day 21 (Fig 5),  
243 suggesting localized virus replication in the pharyngeal mucosa.

244 The sample size used in this study is relatively limited (three anti-CD8 antibody treated  
245 animals and five untreated controls). However, these three animals exhibited similar levels of  
246 pharyngeal viral loads before the anti-CD8 antibody treatment, and again showed similar levels  
247 of viral loads after CD8<sup>+</sup> cell depletion. Neither enhancement of viral replication nor delay in  
248 viral control was observed. Therefore, this study provides sufficient evidence for our conclusion.

249 In summary, the present study showed that subacute SARS-CoV-2 replication can be  
250 controlled even in the absence of CD8<sup>+</sup> T cells. In SARS-CoV-2 infection, CD8<sup>+</sup> T-cell  
251 responses may contribute to viral control, but our results suggest that CD8<sup>+</sup> T-cell dysfunction  
252 does not solely lead to viral control failure or disease progression.

253

254 **Materials and Methods**

255 **Ethics statement**

256 Animal experiments were performed in the National Institute of Infectious Diseases  
257 (NIID) after approval by the Committee on the Ethics of Animal Experiments in NIID  
258 (permission number: 520001) under the guidelines for animal experiments in accordance with  
259 the Guidelines for Proper Conduct of Animal Experiments established by the Science Council  
260 of Japan (<http://www.scj.go.jp/ja/info/kohyo/pdf/kohyo-20-k16-2e.pdf>). The experiments were  
261 in accordance with the "Weatherall report for the use of non-human primates in research"  
262 recommendations (<https://royalsociety.org/topics-policy/publications/2006/weatherall-report/>).  
263 Each macaque was housed in a separate cage and received standard primate feed and fresh fruit  
264 daily. Virus inoculation, blood collection, nasopharyngeal and throat swab collection, and anti-  
265 CD8 antibody treatment were performed under ketamine anesthesia. Macaques were euthanized  
266 by whole blood collection under deep anesthesia on day 14 or 21 post-infection.

267

268 **Animal experiments**

269 SARS-CoV-2 wk-521 strain [39] (2019-nCoV/Japan/TY/WK-521/2020, GenBank  
270 Accession LC522975) was expanded in Vero E6/TMPRSS2 cells [39] and harvested to prepare  
271 a virus inoculum stock. Virus infectivity was assessed by detection of cytopathic effect (CPE)  
272 on Vero E6/TMPRSS2 cells and determination of endpoint titers. Nine cynomolgus macaques  
273 (*Macaca fascicularis*, 3-6 years old) were intranasally inoculated with the same stock of SARS-  
274 CoV-2 wk-521 at a dose of  $10^6$  (exactly  $7.5 \times 10^5$ ) TCID<sub>50</sub> ( $1.4 \times 10^9$  RNA copies) (n = 3),  $10^5$   
275 (exactly  $7.5 \times 10^4$ ) TCID<sub>50</sub> (n = 5), or  $10^4$  (exactly  $7.5 \times 10^3$ ) TCID<sub>50</sub> (n = 1) (Table 1). Three  
276 (Group D) of the nine macaques were intravenously administered with 5 mg/kg body weight  
277 of anti-CD8 $\alpha$  antibody clone MT807 (NIH Nonhuman Primate Reagent Resource) on days 5  
278 and 7 post-infection. Body temperature was measured with a small implantable thermo logger

279 (DST micro-T; Star-Oddi) that was set intraperitoneally under ketamine anesthesia at least five  
280 days prior to virus inoculation. Macaques were euthanized and subjected to necropsy on day 14  
281 or 21 post-infection (Table 1).

282

### 283 **Detection of SARS-CoV-2 RNAs**

284 Swab RNA was extracted from 0.2 ml of swab solutions (1ml of DMEM with 2% fetal  
285 bovine serum [Cytiva]) using QIAamp Viral RNA Minikit (QIAGEN) and subjected to real-  
286 time RT-PCR for viral RNA quantitation [40] using QuantiTect Probe RT-PCR Kit (Qiagen)  
287 and QuantStudio 5 (Thermo Fisher Scientific). Swab RNAs were also subjected to real-time  
288 RT-PCR for measurement of viral subgenomic RNA (sgRNA) levels [32,33,41] using the  
289 following primers: SARS2-LeaderF60 (5'-CGATCTCTTGATAGATCTGTTCTCT-3'), SARS2-  
290 N28354R (5'-TCTGAGGGTCCACCAAACGT-3'), and SARS2-N28313Fam (FAM-  
291 TCAGCGAAATGCACCCCGCA-TAMRA). Tissue RNAs were extracted from homogenized  
292 tissues by using TRIzol™ Plus RNA Purification Kit (Thermo Fisher Scientific) with phenol-  
293 chloroform extraction and subjected to real-time RT-PCR for detection of viral RNAs.

294

### 295 **Virus recovery from swabs**

296 Vero E6/TMPRSS2 cells in 96-well plates were added with 10-fold serially diluted swab  
297 solutions and cultured for 4 days without medium change. Virus recovery was assessed by  
298 detection of CPE and determination of endpoint titers. Swab samples with virus titers greater  
299 than  $1 \times 10^2$  TCID<sub>50</sub>/swab were considered positive.

300

### 301 **Analysis of anti-SARS-CoV-2 NAb responses**

302 Plasma samples were heat inactivated for 30 min at 56 °C. Serial two-fold dilutions of  
303 heat-inactivated plasma were tested in quadruplicate. In each mixture for quadruplicate testing,

304 40  $\mu$ l of diluted plasma were incubated with 40  $\mu$ l of 80 TCID<sub>50</sub> SARS-CoV-2 wk-521. After  
305 incubation for 45 min at room temperature, 20  $\mu$ l of the mixture was added to each of four wells  
306 ( $1 \times 10^4$  Vero cells/well) in a 96-well plate. Three days later, virus infectivity was assessed by  
307 detection of CPE to determine the endpoint titers. The lower limit of detection was 1:10.

308

### 309 **Analysis of cell surface markers**

310 Whole blood samples were treated with Lysing Solution (BD) and subjected to surface  
311 staining using anti-CD3 APC-Cy7 (SP34-2; BD), anti-CD4 FITC (M-T477; BD), anti-CD8  
312 PerCP (SK1; BD), and anti-CD20 PE (2H7; BD) antibodies. Alternatively, whole blood  
313 samples from anti-CD8 antibody-treated animals were stained with anti-CD3 APC-Cy7, anti-  
314 CD4 PerCP (L200; BD), anti-CD8 FITC (DK25; FUJIFILM), and anti-CD20 PE. Stained cells  
315 were analyzed by BD FACS Canto II.

316

### 317 **Analysis of SARS-CoV-2 antigen-specific CD8<sup>+</sup> T-cell responses**

318 Virus-specific CD8<sup>+</sup> T-cell frequencies were measured by flow cytometric analysis of  
319 gamma interferon (IFN- $\gamma$ ) induction after specific stimulation as described previously [42].  
320 PBMCs were prepared from whole blood by density gradient centrifugation using Ficoll-Paque  
321 PLUS (Cytiva). Lymph node-derived lymphocytes were prepared from minced lymph nodes by  
322 density gradient centrifugation using Ficoll-Paque PLUS. Cells were pulsed and cocultured  
323 with peptide pools (at a final concentration of more than 0.1  $\mu$ M for each peptide) using panels  
324 of overlapping peptides spanning the SARS-CoV-2 S, N, M, and E amino acid sequences (PM-  
325 WCPV-S-1, PM-WCPV-NCAP-1, PM-WCPV-VME-1, and PM-WCPV-VEMP-1; JPT Peptide  
326 Technologies) in the presence of GolgiStop (monensin, BD), 1  $\mu$ g/ml of anti-CD28 (CD28.2,  
327 BD) and 1  $\mu$ g/ml anti-CD49d (9F10, BD) for 6 hours. Intracellular IFN- $\gamma$  staining was  
328 performed with a CytotfixCytoperm kit (BD) and anti-CD3 APC-Cy7, anti-CD4 FITC, anti-

329 CD8 PerCP, and anti-IFN- $\gamma$  PE (4S.B3; BioLegend). Stained cells were analyzed by BD FACS  
330 Lyric. A representative gating schema for flow cytometric analysis is shown in Fig. 5A. Specific  
331 T-cell frequencies were calculated by subtracting nonspecific IFN- $\gamma$ <sup>+</sup> T-cell frequencies from  
332 those after peptide-specific stimulation. Specific T-cell frequencies less than 0.03% of CD8<sup>+</sup> T  
333 cells were considered negative.

334

### 335 **Statistical analysis**

336 Statistical analyses were performed using Prism software (GraphPad Software, Inc.) with  
337 significance set at  $p$  values of  $< 0.05$ . Comparisons were performed by Mann-Whitney U test.

338

339

### 340 **Acknowledgments**

341 We thank S. Matsuyama and M. Takeda for providing SARS-CoV-2 wk-521 and Vero  
342 E6/TMPRSS2 cells, H. Ohashi and K. Watashi for providing Vero cells, and S. Fukushi for his  
343 help. We also thank M. de Souza for editing the paper.

344



345 **References**

- 346 1. World Health Organization. Situation reports.  
347 <https://www.who.int/emergencies/diseases/novel-coronavirus-2019/situation-reports>.
- 348 2. Wiersinga WJ, Rhodes A, Cheng AC, Peacock SJ, Prescott HC. Pathophysiology,  
349 transmission, diagnosis, and treatment of coronavirus disease 2019 (COVID-19): a review.  
350 JAMA. 2020; 324(8):782-93. doi: 10.1001/jama.2020.12839.
- 351 3. Kenny G, Mallon PW. COVID19- clinical presentation and therapeutic considerations.  
352 Biochem Biophys Res Commun. 2021; 538:125-131. doi: 10.1016/j.bbrc.2020.11.021.
- 353 4. Garg S, Kim L, Whitaker M, O'Halloran A, Cummings C, Holstein R, et al. Hospitalization  
354 rates and characteristics of patients hospitalized with laboratory-confirmed coronavirus  
355 disease 2019 - COVID-NET, 14 States, March 1-30, 2020. MMWR Morb Mortal Wkly  
356 Rep. 2020; 69(15):458-64. doi: 10.15585/mmwr.mm6915e3.
- 357 5. Richardson S, Hirsch JS, Narasimhan M, Crawford JM, McGinn T, Davidson KW, et al.  
358 Presenting characteristics, comorbidities, and outcomes among 5700 patients hospitalized  
359 with COVID-19 in the New York City area. JAMA. 2020; 323(20):2052-9.
- 360 6. Grasselli G, Zangrillo A, Zanella A, Antonelli M, Cabrini L, Castelli A, et al. Baseline  
361 characteristics and outcomes of 1591 patients infected with SARS-CoV-2 admitted to ICUs  
362 of the Lombardy Region, Italy. JAMA. 2020; 323(16):1574-81.
- 363 7. Arunachalam PS, Wimmers F, Mok CKP, Perera R, Scott M, Hagan T, et al. Systems  
364 biological assessment of immunity to mild versus severe COVID-19 infection in humans.  
365 Science. 2020; 369(6508):1210-20.
- 366 8. Blanco-Melo D, Nilsson-Payant BE, Liu WC, Uhl S, Hoagland D, Moller R, et al.  
367 Imbalanced host response to SARS-CoV-2 drives development of COVID-19. Cell. 2020;  
368 181(5):1036-45.e9. doi: 10.1016/j.cell.2020.04.026.
- 369 9. Bastard P, Rosen LB, Zhang Q, Michailidis E, Hoffmann HH, Zhang Y, et al.

- 370 Autoantibodies against type I IFNs in patients with life-threatening COVID-19. *Science*.  
371 2020; 370(6515): eabd4585. doi: 10.1126/science.abd4585.
- 372 10. Zhang Q, Bastard P, Liu Z, Le Pen J, Moncada-Velez M, Chen J, et al. Inborn errors of  
373 type I IFN immunity in patients with life-threatening COVID-19. *Science*. 2020;  
374 370(6515):eabd4570. doi: 10.1126/science.abd4570.
- 375 11. Liu Y, Yan LM, Wan L, Xiang TX, Le A, Liu JM, et al. Viral dynamics in mild and severe  
376 cases of COVID-19. *Lancet Infect Dis*. 2020; 20(6):656-7.
- 377 12. Vabret N, Britton GJ, Gruber C, Hegde S, Kim J, Kuksin M, et al. Immunology of COVID-  
378 19: Current state of the Science. *Immunity*. 2020; 52(6):910-941. doi:  
379 10.1016/j.immuni.2020.05.002.
- 380 13. Ni L, Ye F, Cheng ML, Feng Y, Deng YQ, Zhao H, et al. Detection of SARS-CoV-2-  
381 Specific humoral and cellular immunity in COVID-19 convalescent individuals. *Immunity*.  
382 2020; 52(6):971-7 e3.
- 383 14. Rydzynski Moderbacher C, Ramirez SI, Dan JM, Grifoni A, Hastie KM, Weiskopf D, et  
384 al. Antigen-specific adaptive immunity to SARS-CoV-2 in acute COVID-19 and  
385 associations with age and disease severity. *Cell*. 2020; 183(4):996-1012 e19.
- 386 15. Wajnberg A, Amanat F, Firpo A, Altman DR, Bailey MJ, Mansour M, et al. Robust  
387 neutralizing antibodies to SARS-CoV-2 infection persist for months. *Science*. 2020;  
388 370(6521):1227-30.
- 389 16. Dan JM, Mateus J, Kato Y, Hastie KM, Yu ED, Faliti CE, et al. Immunological memory  
390 to SARS-CoV-2 assessed for up to 8 months after infection. *Science*. 2021;  
391 371(6529):eabf4063. doi: 10.1126/science.abf4063.
- 392 17. Garcia-Beltran WF, Lam EC, Astudillo MG, Yang D, Miller TE, Feldman J, et al. COVID-  
393 19-neutralizing antibodies predict disease severity and survival. *Cell*. 2021; 184:476-  
394 488.e411. doi: 10.1016/j.cell.2020.12.015.

- 395 18. Shen C, Wang Z, Zhao F, Yang Y, Li J, Yuan J, et al. Treatment of 5 Critically Ill  
396 Patients With COVID-19 With Convalescent Plasma. *JAMA*. 2020; 323(16):1582-9.
- 397 19. Gottlieb RL, Nirula A, Chen P, Boscia J, Heller B, Morris J, et al. Effect of Bamlanivimab  
398 as monotherapy or in combination with Etesevimab on viral load in patients with mild to  
399 moderate COVID-19: A randomized clinical trial. *JAMA*. 2021; 325(7):632-44.
- 400 20. Weinreich DM, Sivapalasingam S, Norton T, Ali S, Gao H, Bhore R, et al. REGN-COV2,  
401 a neutralizing antibody cocktail, in outpatients with COVID-19. *N Engl J Med*. 2021;  
402 384(3):238-51.
- 403 21. Hassan AO, Case JB, Winkler ES, Thackray LB, Kafai NM, Bailey AL, et al. A SARS-  
404 CoV-2 infection model in mice demonstrates protection by neutralizing antibodies. *Cell*.  
405 2020; 182(3):744-53 e4.
- 406 22. Rogers TF, Zhao F, Huang D, Beutler N, Burns A, He WT, et al. Isolation of potent SARS-  
407 CoV-2 neutralizing antibodies and protection from disease in a small animal model.  
408 *Science*. 2020; 369(6506):956-63.
- 409 23. Baum A, Ajithdoss D, Copin R, Zhou A, Lanza K, Negron N, et al. REGN-COV2  
410 antibodies prevent and treat SARS-CoV-2 infection in rhesus macaques and hamsters.  
411 *Science*. 2020; 370:1110-1115. doi: 10.1126/science.abe2402.
- 412 24. Jones BE, Brown-Augsburger PL, Corbett KS, Westendorf K, Davies J, Cujec TP, et al.  
413 The neutralizing antibody, LY-CoV555, protects against SARS-CoV-2 infection in non-  
414 human primates. *Sci Transl Med*. 2021; 13(593):eabf1906. doi:  
415 10.1126/scitranslmed.abf1906.
- 416 25. McMahan K, Yu J, Mercado NB, Loos C, Tostanoski LH, Chandrashekar A, et al.  
417 Correlates of protection against SARS-CoV-2 in rhesus macaques. *Nature*. 2021; 590:630-  
418 634. doi: 10.1038/s41586-020-03041-6.
- 419 26. Grifoni A, Weiskopf D, Ramirez SI, Mateus J, Dan JM, Moderbacher CR, et al. Targets of

- 420 T cell responses to SARS-CoV-2 coronavirus in humans with COVID-19 disease and  
421 unexposed individuals. *Cell*. 2020; 181(7):1489-501 e15.
- 422 27. Sekine T, Perez-Potti A, Rivera-Ballesteros O, Stralin K, Gorin JB, Olsson A, et al. Robust  
423 T cell immunity in convalescent individuals with asymptomatic or mild COVID-19. *Cell*.  
424 2020; 183(1):158-68 e14.
- 425 28. DiPiazza AT, Graham BS, Ruckwardt TJ. T cell immunity to SARS-CoV-2 following  
426 natural infection and vaccination. *Biochem Biophys Res Commun*. 2021;538:211-217. doi:  
427 10.1016/j.bbrc.2020.10.060.
- 428 29. Tan AT, Linster M, Tan CW, Le Bert N, Chia WN, Kunasegaran K, et al. Early induction  
429 of functional SARS-CoV-2-specific T cells associates with rapid viral clearance and mild  
430 disease in COVID-19 patients. *Cell Rep*. 2021; 34(6):108728. doi:  
431 10.1016/j.celrep.2021.108728.
- 432 30. Kared H, Redd AD, Bloch EM, Bonny TS, Sumatoh H, Kairi F, et al. SARS-CoV-2-  
433 specific CD8<sup>+</sup> T cell responses in convalescent COVID-19 individuals. *J Clin Invest*. 2021;  
434 131(5):e145476. doi: 10.1172/JCI145476.
- 435 31. Quinti I, Lougaris V, Milito C, Cinetto F, Pecoraro A, Mezzaroma I, et al. A possible role  
436 for B cells in COVID-19? Lesson from patients with agammaglobulinemia. *J Allergy Clin*  
437 *Immunol*. 2020; 146(1):211-3 e4.
- 438 32. Chandrashekar A, Liu J, Martinot AJ, McMahan K, Mercado NB, Peter L, et al. SARS-  
439 CoV-2 infection protects against rechallenge in rhesus macaques. *Science*. 2020;  
440 369(6505):812-817. doi: 10.1126/science.abc4776.
- 441 33. Mercado NB, Zahn R, Wegmann F, Loos C, Chandrashekar A, Yu J, et al. Single-shot Ad26  
442 vaccine protects against SARS-CoV-2 in rhesus macaques. *Nature*. 2020; 586(7830):583-  
443 588. doi: 10.1038/s41586-020-2607-z.
- 444 34. Chen J, Lau YF, Lamirande EW, Paddock CD, Bartlett JH, Zaki SR, et al. Cellular immune

- 445 responses to severe acute respiratory syndrome coronavirus (SARS-CoV) infection in  
446 senescent BALB/c mice: CD4<sup>+</sup> T cells are important in control of SARS-CoV infection. *J*  
447 *Virol.* 2010; 84(3):1289-301.
- 448 35. Channappanavar R, Fett C, Zhao J, Meyerholz DK, Perlman S. Virus-specific memory  
449 CD8 T cells provide substantial protection from lethal severe acute respiratory syndrome  
450 coronavirus infection. *J Virol.* 2014; 88(19):11034-44.
- 451 36. Rockx B, Kuiken T, Herfst S, Bestebroer T, Lamers MM, Oude Munnink BB, et al.  
452 Comparative pathogenesis of COVID-19, MERS, and SARS in a nonhuman primate model.  
453 *Science.* 2020; 368(6494):1012-1015. doi: 10.1126/science.abb7314.
- 454 37. Munster VJ, Feldmann F, Williamson BN, van Doremalen N, Pérez-Pérez L, Schulz J, et  
455 al. Respiratory disease in rhesus macaques inoculated with SARS-CoV-2. *Nature.* 2020;  
456 585(7824):268-272. doi: 10.1038/s41586-020-2324-7.
- 457 38. Salguero FJ, White AD, Slack GS, Fotheringham SA, Bewley KR, Gooch KE, et al.  
458 Comparison of rhesus and cynomolgus macaques as an infection model for COVID-19.  
459 *Nat Commun.* 2021; 12(1):1260. doi: 10.1038/s41467-021-21389-9.
- 460 39. Matsuyama S, Nao N, Shirato K, Kawase M, Saito S, Takayama I, et al. Enhanced isolation  
461 of SARS-CoV-2 by TMPRSS2-expressing cells. *Proc Natl Acad Sci U S A.* 2020;  
462 117(13):7001-7003. doi: 10.1073/pnas.2002589117.
- 463 40. Shirato K, Nao N, Katano H, Takayama I, Saito S, Kato F, et al. Development of genetic  
464 diagnostic methods for detection for novel coronavirus 2019(nCoV-2019) in Japan. *Jpn J*  
465 *Infect Dis.* 2020; 73(4):304-307. doi: 10.7883/yoken.JJID.2020.061.
- 466 41. Nagata N, Iwata-Yoshikawa N, Sano K, Ainai A, Shiwa N, Shirakura M, et al. The  
467 peripheral T cell population is associated with pneumonia severity in cynomolgus monkeys  
468 experimentally infected with severe acute respiratory syndrome coronavirus 2. bioRxiv preprint  
469 doi: <https://www.biorxiv.org/content/10.1101/2021.01.07.425698v1>.

- 470 42. Nomura T, Yamamoto H, Ishii H, Akari H, Naruse TK, Kimura A, et al. Broadening of  
471 virus-specific CD8<sup>+</sup> T-cell responses is indicative of residual viral replication in aviremic  
472 SIV controllers. PLoS Pathog. 2015; 11(11):e1005247. doi: 10.1371/journal.ppat.1005247.  
473

474 **Supporting Information**

475 **S1 Fig. Changes in body temperatures pre- and post-infection in macaques.**

476

477 **S2 Fig. Histopathology of the lung in macaque N021.**

478 Representative histopathology with hematoxylin and eosin staining (H&E) of the lung obtained  
479 from macaque N021 at autopsy on day 14 post-infection, indicating mild or moderate  
480 pulmonary inflammation. Infiltration of mononuclear cells were observed around blood vessels  
481 and bronchiole (upper left panel). Lymphocytes, eosinophils, and macrophages were observed  
482 in pulmonary alveoli (upper right and lower panels).

483

484 **Figure Captions**

485 **Fig 1. Viral RNA levels in swabs.**

486 (A-D) Changes in viral RNA levels in nasopharyngeal (A, C, D) and throat (B) swabs after  
487 SARS-CoV-2 infection in all animals (A, B) or those infected with  $10^6$  (C) or  $10^5$  (D) TCID<sub>50</sub>  
488 of SARS-CoV-2. The lower limit of detection was approximately  $3 \times 10^3$  copies/swab. (E)  
489 Comparison of viral RNA levels in nasopharyngeal swabs at day 5 post-infection between  $10^6$   
490 TCID<sub>50</sub>-infected and  $10^5$  TCID<sub>50</sub>-infected macaques. No significant difference was observed.  
491 (F) Comparison of viral RNA levels in nasopharyngeal swabs at days 5 (left), 7 (middle), and  
492 9-12 (right) post-infection between Group N and D animals infected with  $10^6$  or  $10^5$  TCID<sub>50</sub> of  
493 SARS-CoV-2. No significant difference was observed.

494

495 **Fig 2. Viral subgenomic RNA levels in swabs.**

496 Changes in viral sgRNA levels in nasopharyngeal (A, C, D) and throat (B) swabs after SARS-  
497 CoV-2 infection in all animals (A, B) or those infected with  $10^6$  (C) or  $10^5$  (D) TCID<sub>50</sub> of SARS-  
498 CoV-2. The lower limit of detection was approximately  $3 \times 10^3$  copies/swab.

499

500 **Fig 3. Peripheral blood B- and T-cell frequencies.**

501 Changes in %CD3<sup>+</sup>, %CD3<sup>+</sup>CD4<sup>+</sup>, %CD3<sup>+</sup>CD8<sup>+</sup>, and %CD3<sup>-</sup>CD20<sup>+</sup> T cells in macaque  
502 PBMCs after SARS-CoV-2 infection.

503

504 **Fig 4. SARS-CoV-2-specific neutralizing antibody responses.**

505 Changes in plasma anti-SARS-CoV-2 neutralizing antibody titers post-infection in all animals  
506 (left) or those infected with  $10^6$  (middle) or  $10^5$  (right) TCID<sub>50</sub> of SARS-CoV-2.

507

508 **Fig 5. SARS-CoV-2-specific CD8<sup>+</sup> T-cell responses.**



509 (A) Representative gating schema for detection of IFN- $\gamma$  induction after stimulation with  
510 overlapping M&E peptide pools in macaque N012 on day 14 post-infection. (B) Frequencies  
511 of CD8<sup>+</sup> T cells targeting S, N, and M&E in PBMCs on days 7, 14, and 21 post-infection in  
512 Group N animals infected with 10<sup>6</sup> (middle) or 10<sup>5</sup> (right) TCID<sub>50</sub> of SARS-CoV-2. (C)  
513 Frequencies of CD8<sup>+</sup> T cells targeting S, N, and M & E in submandibular lymph nodes obtained  
514 at necropsy in macaques N011, N013, N021, and N022. Samples were unavailable for analysis  
515 in macaque N012.

516

517

**Table 1. Macaque experimental protocol**

| Group          | Experiment <sup>a</sup> | Macaques | Gender | Age (yrs) | SARS-CoV-2 dose <sup>b</sup> (TCID <sub>50</sub> ) | anti-CD8 Ab Tx <sup>c</sup> | Necropsy <sup>d</sup> |
|----------------|-------------------------|----------|--------|-----------|----------------------------------------------------|-----------------------------|-----------------------|
| N              | 1                       | N011     | male   | 6         | 10 <sup>6</sup>                                    | NT                          | d21                   |
| N              | 1                       | N012     | male   | 6         | 10 <sup>5</sup>                                    | NT                          | d21                   |
| N              | 1                       | N013     | male   | 6         | 10 <sup>5</sup>                                    | NT                          | d21                   |
| - <sup>e</sup> | 1                       | N014     | male   | 6         | 10 <sup>4</sup>                                    | NT                          | d21                   |
| N              | 2                       | N021     | female | 3         | 10 <sup>6</sup>                                    | NT                          | d14                   |
| N              | 2                       | N022     | female | 3         | 10 <sup>5</sup>                                    | NT                          | d21                   |
| D              | 2                       | D023     | male   | 6         | 10 <sup>6</sup>                                    | d5 & d7                     | d21                   |
| D              | 2                       | D024     | male   | 6         | 10 <sup>5</sup>                                    | d5 & d7                     | d21                   |
| D              | 2                       | D025     | female | 3         | 10 <sup>5</sup>                                    | d5 & d7                     | d21                   |

518

<sup>a</sup>Two sets of experiments were performed using the same SARS-CoV-2 inoculum stock.

519

<sup>b</sup>Macaques were intranasally inoculated with the indicated doses (10<sup>6</sup> [exactly 7.5 x 10<sup>5</sup>], 10<sup>5</sup> [exactly 7.5 x 10<sup>4</sup>], or 10<sup>4</sup> [exactly 7.5 x 10<sup>3</sup>] TCID<sub>50</sub>) of SARS-CoV-2 on day 0.

520

521

<sup>c</sup>Macaques in Group D were treated intravenously with anti-CD8 antibody on days 5 and 7 post-infection. NT, not treated.

522

523

<sup>d</sup>Macaques were euthanized and necropsied on day 14 or 21 post-infection.

524

<sup>e</sup>N014 was excluded from comparisons between groups N and D.

525

526

**Table 2. Virus recovery from pharyngeal swabs after SARS-CoV-2 infection**

| Macaques | Virus recovery from swabs <sup>a</sup> |    |    |    |       |     |     |     |     |
|----------|----------------------------------------|----|----|----|-------|-----|-----|-----|-----|
|          | d0                                     | d2 | d5 | d7 | d9/10 | d12 | d14 | d17 | d21 |
| N011     | -                                      | +  | +  | +  | -     | -   | -   | -   | -   |
|          | -                                      | +  | +  | -  | -     | -   | -   | -   | -   |
| N012     | -                                      | +  | +  | +  | -     | +   | -   | -   | -   |
|          | -                                      | +  | -  | -  | -     | -   | -   | -   | -   |
| N013     | -                                      | +  | -  | -  | -     | -   | -   | -   | -   |
|          | -                                      | +  | +  | -  | -     | -   | -   | -   | -   |
| N014     | -                                      | -  | -  | -  | -     | -   | -   | -   | -   |
|          | -                                      | +  | -  | -  | -     | -   | -   | -   | -   |
| N021     | -                                      | +  | -  | -  | -     | -   | -   | -   | -   |
|          | -                                      | +  | -  | -  | -     | -   | -   | -   | -   |
| N022     | -                                      | +  | +  | -  | -     | -   | -   | -   | -   |
|          | -                                      | +  | -  | -  | -     | -   | -   | -   | -   |
| D023     | -                                      | +  | -  | +  | -     | -   | -   | -   | -   |
|          | -                                      | +  | -  | -  | -     | -   | -   | -   | -   |
| D024     | -                                      | +  | -  | -  | -     | -   | -   | -   | -   |
|          | -                                      | +  | -  | -  | -     | -   | -   | -   | -   |
| D025     | -                                      | +  | +  | +  | -     | -   | -   | -   | -   |
|          | -                                      | +  | +  | -  | -     | -   | -   | -   | -   |

527

528

529

530

<sup>a</sup>Swab samples were added to Vero-E6 cell culture to recover infectious virus. + indicates successful virus recovery from nasopharyngeal (upper row) or throat (lower row) swabs for each animal.

531 **Table 3. Detection of viral RNA in tissues obtained at necropsy**

| Macaques | Autopsy | Detection of viral RNA in tissues <sup>a</sup> |                            |      |           |        |
|----------|---------|------------------------------------------------|----------------------------|------|-----------|--------|
|          |         | Pharyngeal mucosa                              | Retropharyngeal lymph node | Lung | Intestine | Spleen |
| N011     | d21     | -                                              | +                          | -    | -         | -      |
| N012     | d21     | -                                              | -                          | -    | -         | -      |
| N013     | d21     | +                                              | +                          | -    | -         | +      |
| N014     | d21     | -                                              | -                          | -    | -         | -      |
| N021     | d14     | -                                              | -                          | -    | -         | -      |
| N022     | d21     | -                                              | -                          | -    | -         | +      |
| D023     | d21     | -                                              | -                          | -    | -         | -      |
| D024     | d21     | -                                              | -                          | -    | -         | -      |
| D025     | d21     | -                                              | -                          | -    | -         | +      |

532 <sup>a</sup>RNA was extracted from individual tissues and subjected to RT-PCR to detect SARS-CoV-2  
533 RNA. + indicates detection of viral RNA.

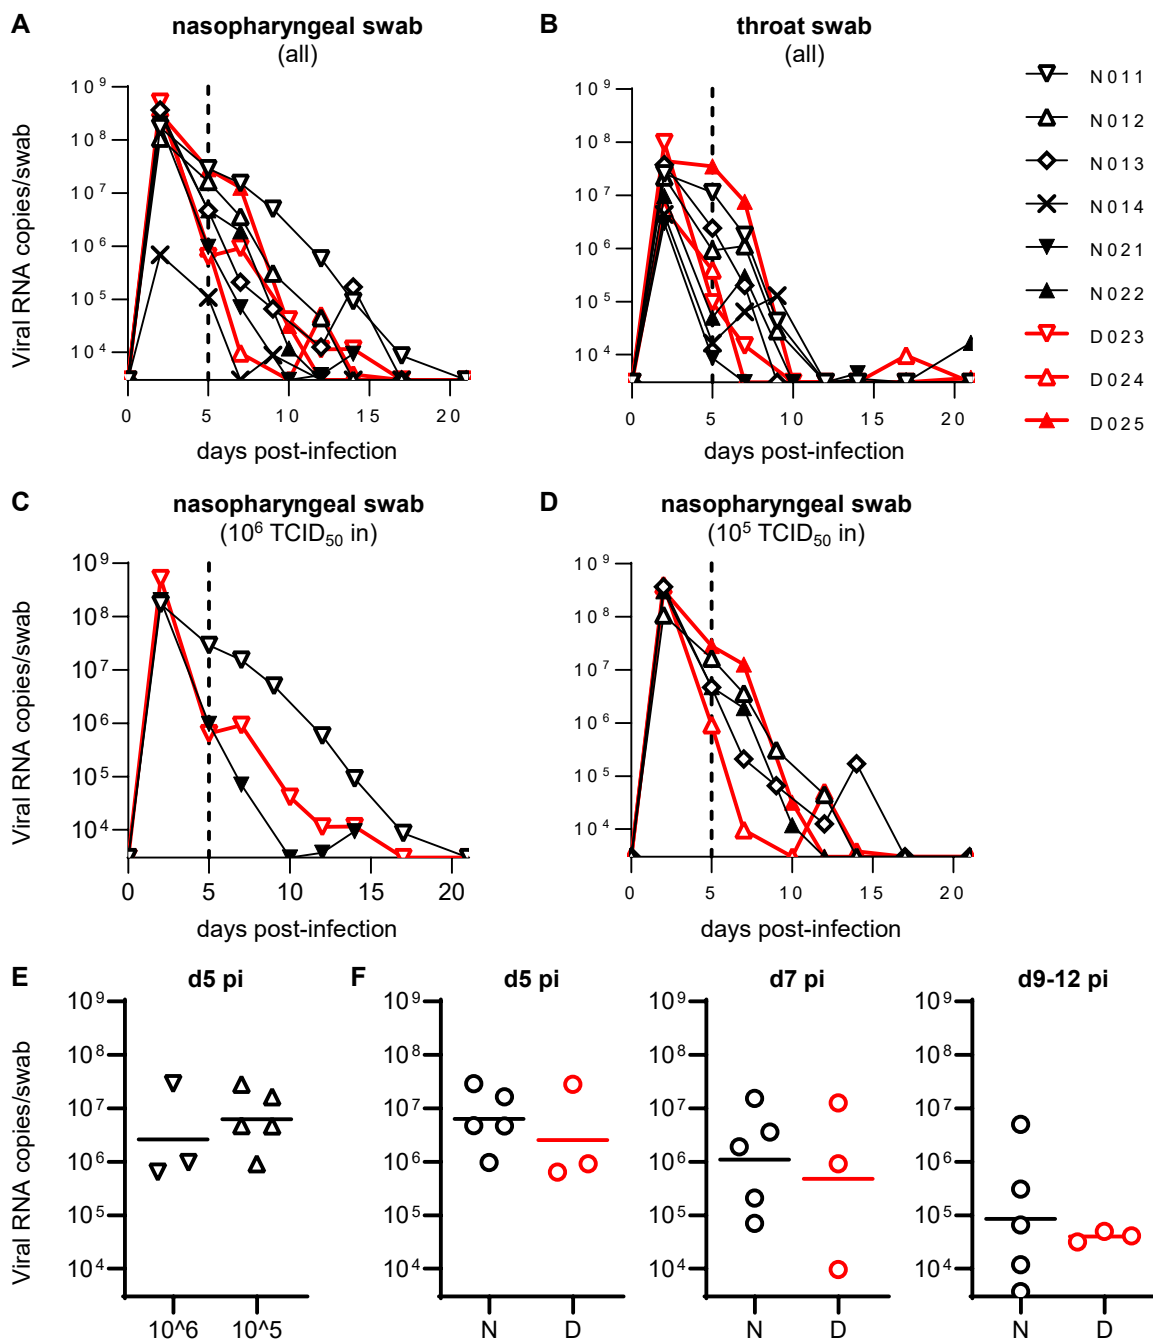

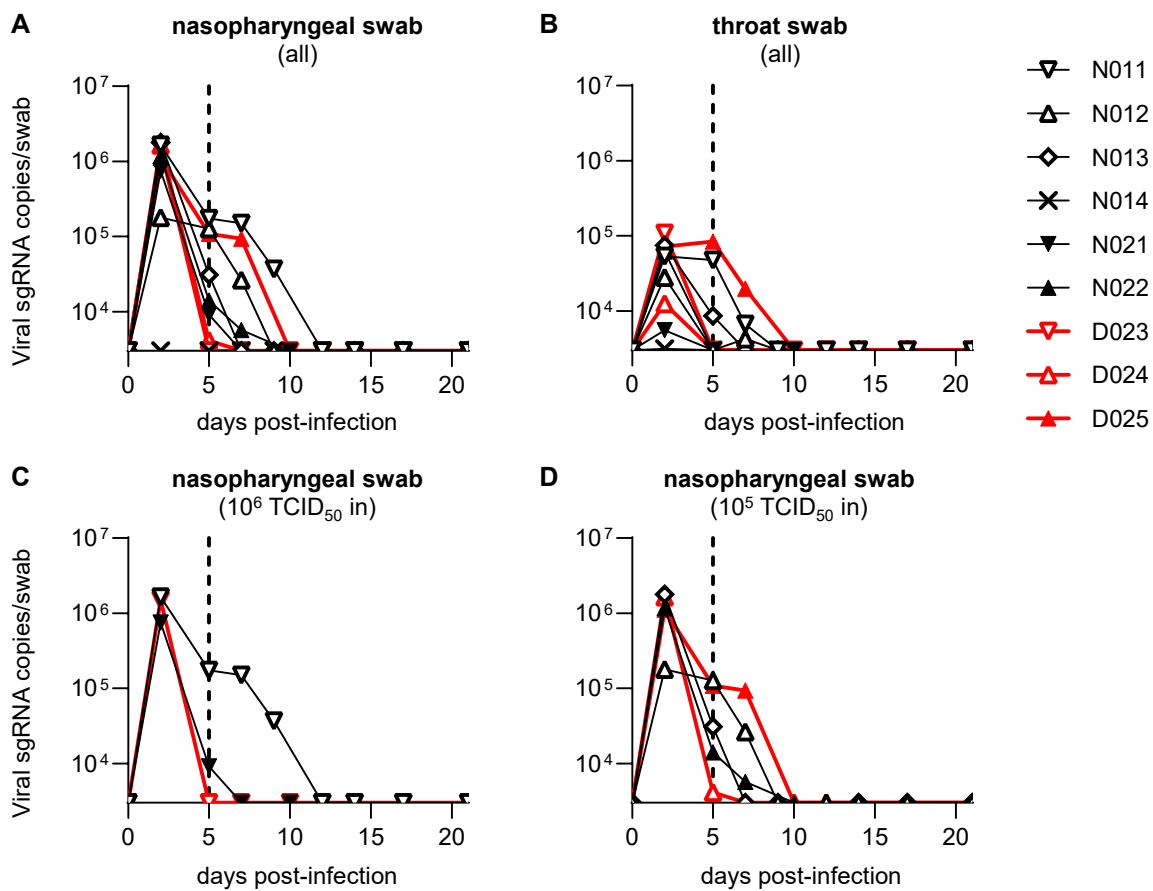

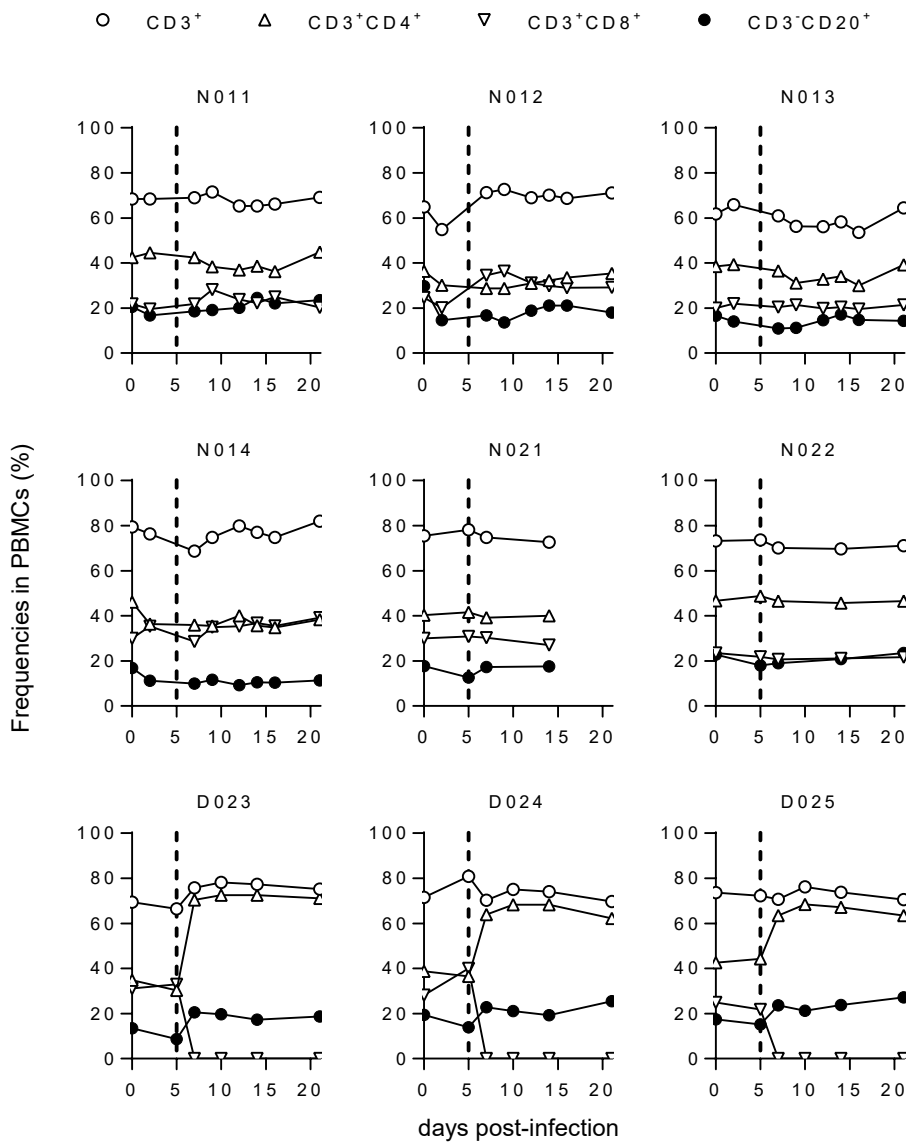

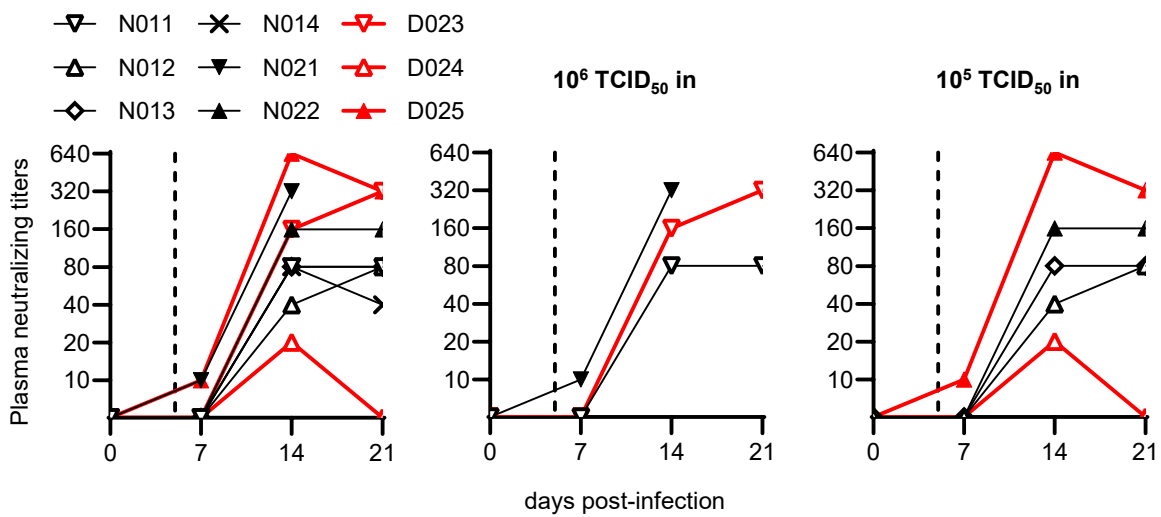



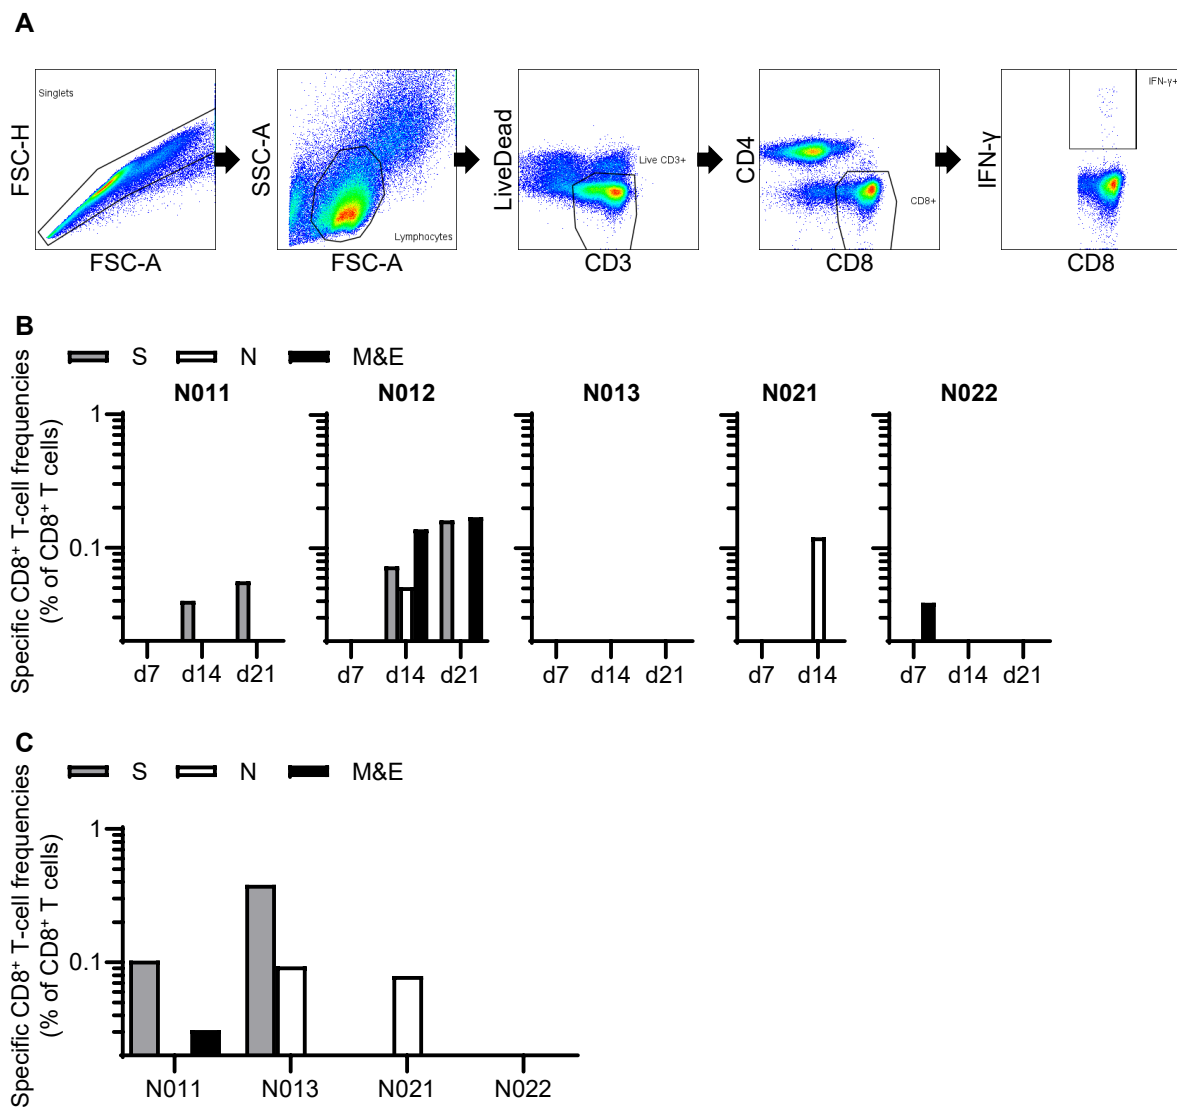

Source: https://www.biorxiv.org/content/biorxiv/early/2021/05/26/2021.05.26.445769.full.pdf
